# Supplementary material
Source: publisher site journal article supplement (https://www.kjim.org/upload/media/kjim-2023-357-Supplementary-Fig-2.pdf)

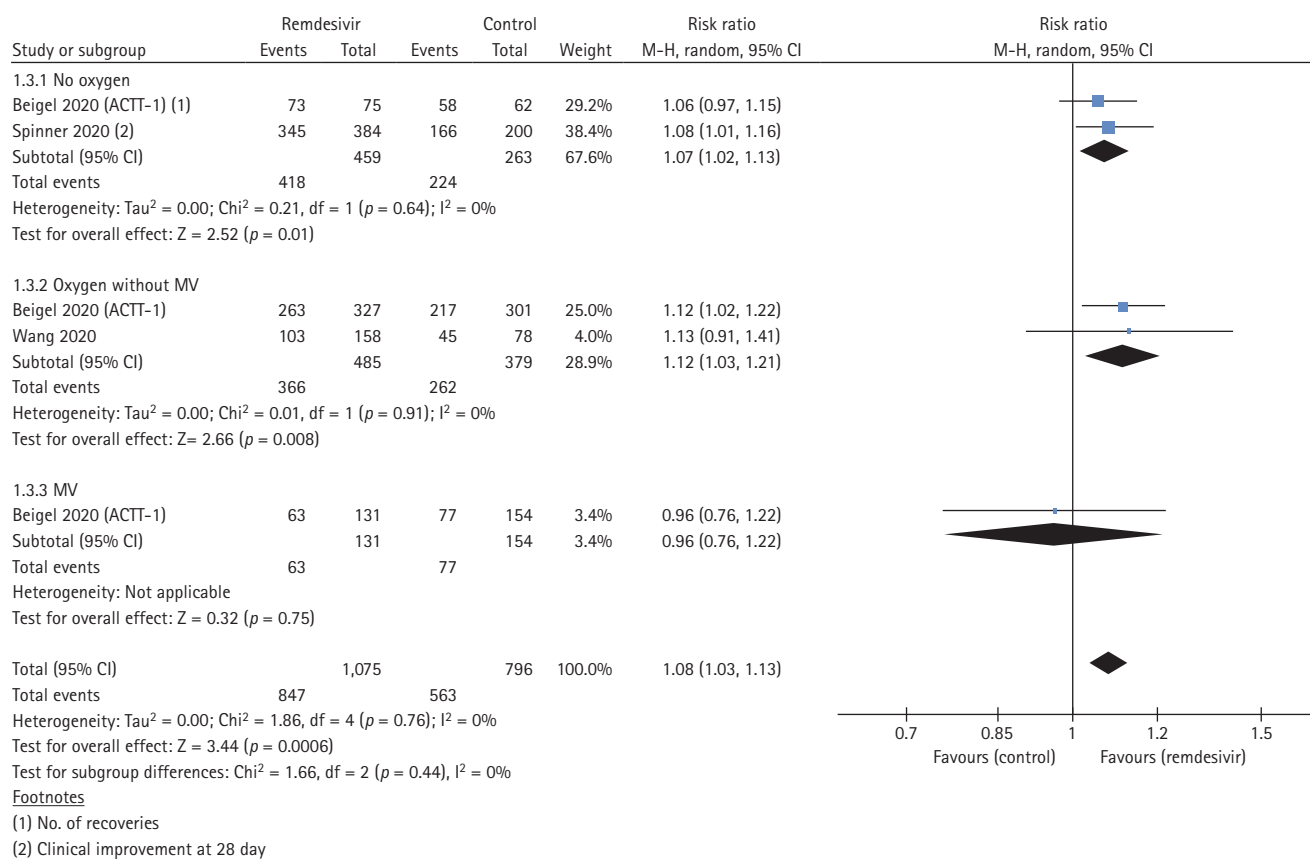

**Supplementary Figure 2.** Forest plot of clinical improvement.

Supplement: Supplementary file 1 [file kjim-2023-357-Supplementary-Fig-2.pdf]
